# Supplementary material
Source: HighWire-hosted journal article supplement (doi:10.1101/rna.080705.125)
Supplement: Supplemental_FigS1.pdf [file Supplemental_FigS1.pdf]

# Supplemental Figure 1

## A

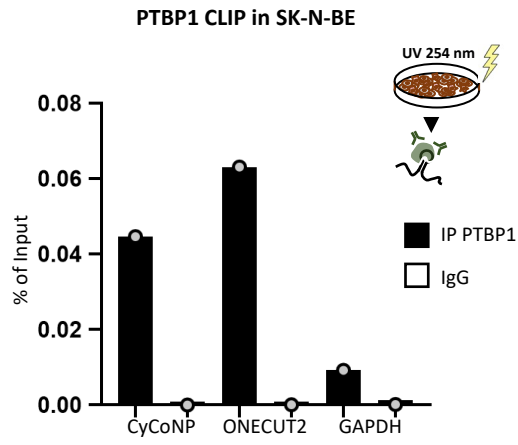

## B

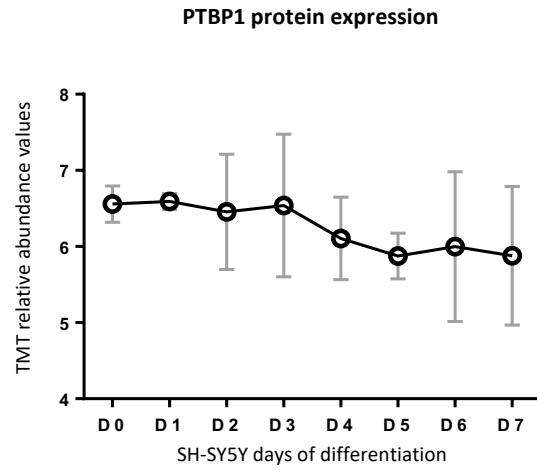

## C

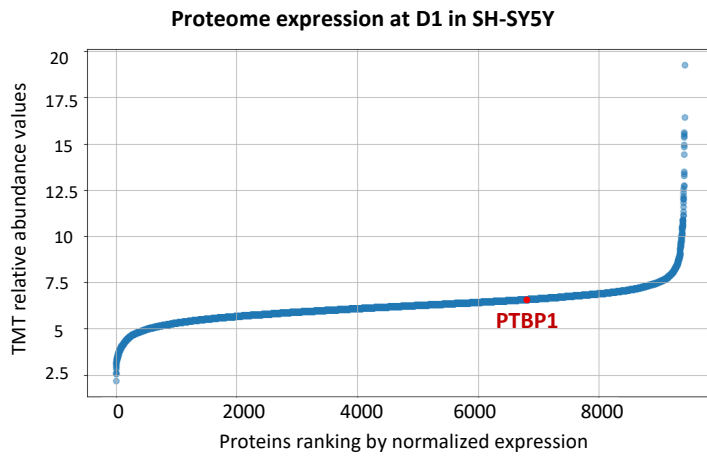

## Supplemental Figure 1

**A)** RT-qPCR quantification of CyCoNP transcript recovery in IP and IgG samples of PTBP1 Cross-linking immunoprecipitation (CLIP) assay performed on SK-N-BE cells (D 1.5). *ONECUT2* transcript serves as positive control, *GAPDH* transcript serves as a negative one. Values are expressed as percentage (%) of Input. N=1. A schematic representation of the CLIP assay is shown.

**B)** Representation of PTBP1 protein expression levels in a time course of SH-SY5Y cell line differentiation as retrieved from the TMT (Tandem Mass Tag)-based quantitative mass spectrometry experiment performed in Zhang et al. 2021. Data represents mean of two biological replicates and error bars represents SD.

**C)** Scatter plot showing the distribution of the proteome expression levels at Day 1 of SH-SY5Y cell line differentiation as retrieved from the TMT (Tandem Mass Tag)-based quantitative mass spectrometry experiment performed in Zhang et al. 2021. Each blue dot represents the expression levels of a single protein (mean of two biological duplicates). PTBP1 dot is highlighted in red.
