# Supplementary material
Source: HighWire-hosted journal article supplement (doi:10.1101/rna.080705.125)
Supplement: Supplemental_FigS2.pdf [file Supplemental_FigS2.pdf]

Supplemental Figure 2

**A**

chr12:54,126,191-54,147,483 (*hg38*)

Linc-02381-201 (CyCoNP)

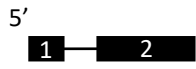

Linc-02381-204

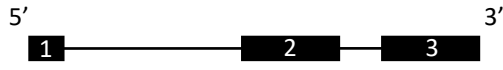

Linc-02381-203

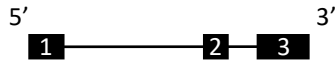

RNA analysis

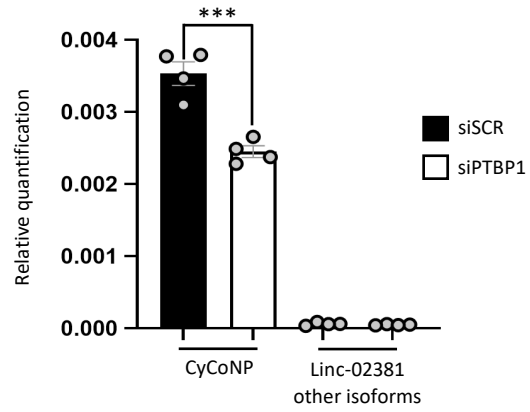

**B**

CyCoNP in native RNA pull-down

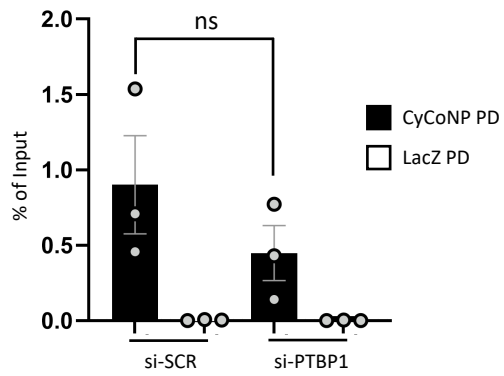

**C**

RNA analysis

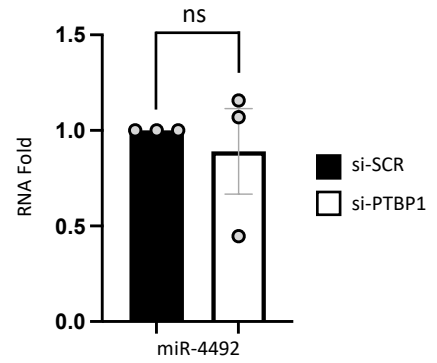

**D**

PTBP1 IP in SK-N-BE

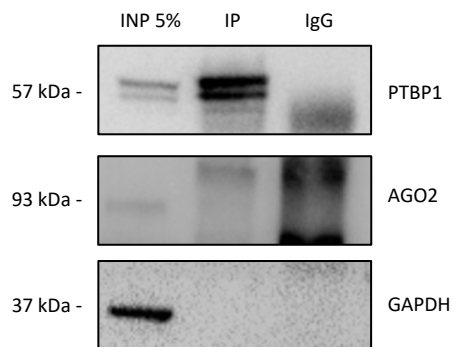

**E**

AGO2 IP in SK-N-BE

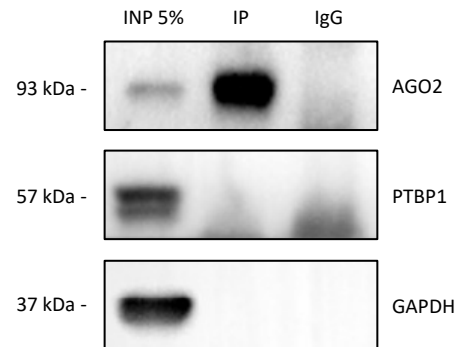

## Supplemental Figure 2

**A)** Left: schematic representation of Linc-02381 locus structure according to the *hg38* version of the human genome. Exons are numbered and represented as bold lines. Right: RT-qPCR quantification of linc-02381-201 (CyCoNP) and linc-02381 other isoforms transcripts in SK-N-BE cells (D 1.5) treated with si-SCR or siPTBP1. Data were normalized to GAPDH transcript and represent means  $\pm$  SEM of four biological replicates.

**B)** RT-qPCR quantification of CyCoNP transcript in the specific pull-down (CyCoNP PD) and in the control (LacZ PD) performed on SK-N-BE cells (D 1.5) treated with si-SCR or si-PTBP1. Values are expressed as percentage (%) of Input and represent means  $\pm$  SEM of three biological replicates.

**C)** RT-qPCR quantification of miR-4492 transcript in SK-N-BE cells (D 1.5) treated with si-SCR or si-PTBP1. Data were normalized to miR-93-3p transcript (a cytoplasmic microRNA expressed at a comparable level of miR-4492) and represent means  $\pm$  SEM of three biological replicates.

**D)** Western blot analysis of the retrieved protein fractions in PTBP1 IP and IgG samples. GAPDH protein serves as a loading control. Input (Inp) sample represents 5% of the total protein extract.

**E)** Western blot analysis of the retrieved protein fractions in AGO2 IP and IgG samples. GAPDH protein serves as a loading control. Input (Inp) sample represents 5% of the total protein extract.

Data information: ns (non-significant)  $p > 0.05$ , \*\*\* $p < 0.001$ , unpaired Student's t test.
