# Supplementary material
Source: HighWire-hosted journal article supplement (doi:10.1101/rna.080705.125)
Supplement: Supplemental_Table_S1.xlsx [file Supplemental_Table_S1.xlsx]

## Sheet: Oligonucleotides
List of oligonucleotides
Oligonucleotides for RT-qPCR
Name	Sequence (5’-3’) or catalogue no.
CyCoNP Fw	ATCTAGATGAGCCTGTCCGG
CyCoNP Rv	CAGCTGCTCACCAAGGTCT
hs-PTBP1 Fw	GGCGTCGTCAAAGGATTCAA
hs-PTBP1 Rv	GTTGTGCAGGTCAATGAGGG
hs-NCAM1 Fw	AAAGGGCTGGGTGAGATCAG
hs-NCAM1 Rv	TTCCATCCTCTCCCATCTGC
hs-ONECUT2 Fw	CTGCTCCGGAATCCAAAACC
hs-ONECUT2 Rv	GCGGGACTTCTTCTGGGAAT
hs-miR-4492	miRCURY miRNA Assay hsa-miR-4492 (Qiagen)
hs-miR-1249-5p	miRCURY miRNA Assay hsa-miR-1249-5p (Qiagen)
hs-miR-93-3p	miRCURY miRNA Assay hsa-miR-93-3p (Qiagen)
hs-GAPDH Fw	CACCATCTTCCAGGAGTGAG
hs-GAPDH Rv	CCTTCTCCATGGTGGTGAAGAC
Linc-02381 other isoforms Rv	CATCAAGGAGCTGGGAATGC
RNAi oligonucleotides
Name	Catalogue no.
si-SCR	ON-TARGET plus Non Targeting Pool D001810-10-20 (Dharmacon)
si-PTBP1	ON-TARGETplus SMARTpool Human PTBP1 L-003528-00-0005 (Dharmacon)
Biotinylated oligonucleotides for RNA Pull-Down experiments
Name	Sequence (5’-3’)
CyCoNP PD #1	TGGCGAAAAGGGAGGGTGAA
CyCoNP PD #2	GGGAACTGGAGGGAGAGGTC
CyCoNP PD #3	GGACAGAGTGGGCGCTATAG
CyCoNP PD #4	TCAAACGATTCCGGGAGGAG
CyCoNP PD #5	CTGCCAAAAGTTTGTCCTTC
CyCoNP PD #6	GACAGGCTCATCTAGATTTC
CyCoNP PD #7	TAATCAGGGGTGTTCTGCTC
CyCoNP PD #8	CTCACCAAGGTCTGGAACAA
CyCoNP PD #9	GATCCTGCGAAGCAAGTCAG
CyCoNP PD #10	ATCAGGCTCCAGGATGCAAC
CyCoNP PD #11	CAAAGACGGAAGCTGCTTCT
CyCoNP PD #12	CCCAACATGGGGGAGAAAAA
CyCoNP PD #13	AGGCATGGGGAAGGATTAGG
CyCoNP PD #14	TCAGCAGCTTTGAGGCTGAT
CyCoNP PD #15	TGGAAGGTGCAGTTCATGAC
CyCoNP PD #16	TTTGAGTAGCTTATGGGCAG
CyCoNP PD #17	TCAACTTTGACCCCCAAATG
CyCoNP PD #18	TGGCCTTGGTGTGATAAGAA
CyCoNP PD #19	TTTGTGAGGCCAGAGAACAG
CyCoNP PD #20	CCACCTCAACAAACCTTTAC
CyCoNP PD #21	ATTGCTCATTTCACTTCTGT
CyCoNP PD #22	CCGAAGCGACTGACTTCTAA
LacZ PD #1	AATGTGAGCGAGTAACAACC
LacZ PD #2	ATTAAGTTGGGTAACGCCAG
LacZ PD #3	AATAATTCGCGTCTGGCCTT
LacZ PD #4	AATTCAGACGGCAAACGCT
LacZ PD #5	ATCTTCCAGATAACTGCCGT
Cloning oligonucleotides
Name	Sequence (5’-3’)
CyCoNP DPTBP1 Fw (inverse PCR)	GCTCCATTTAGAAGTCAGTCGC
CyCoNP DPTBP1 Rv (inverse PCR)	TGGTTTGTGAGGCCAGAGAA

## Sheet: Antibodies
List of antibodies
Name	Catalogue number
PTBP1	32-4800 (Invitrogen)
NCAM1	GTX634792 (GeneTex)
GAPDH	sc32233 (SantaCruz)
AGO2	MA5-23515 (Invitrogen)
YTHDC1	ab122340 (Abcam)
IgG	sc-2025 (Santa Cruz)
Rabbit Anti-Mouse IgG H&L (HRP)	ab6728 (Abcam)
